# Supplementary material for: Fluorescence imaging-guided multifunctional liposomes for tumor-specific phototherapy for laryngeal carcinoma
Source: Royal Society of Chemistry journal article supplement (doi:10.1039/d0bm00249f), 2020-01-01
Supplement: d0bm00249f1.pdf [file d0bm00249f1.pdf]

## Fluorescence Imaging-Guided Multifunctional Liposomes for Tumor-Specific Phototherapy for Laryngeal carcinoma

Di Wu<sup>a,1</sup>, Zheng Zhao<sup>a,1</sup>, Nan Wang<sup>b,1</sup>, Xinrui Zhang<sup>c</sup>, Honghong Yan<sup>a</sup>, Xiaoqi

Chen<sup>a</sup>, Yunnyun Fan<sup>a</sup>, Weiwei Liu<sup>a,\*</sup>, Xuekui Liu<sup>a,\*\*</sup>

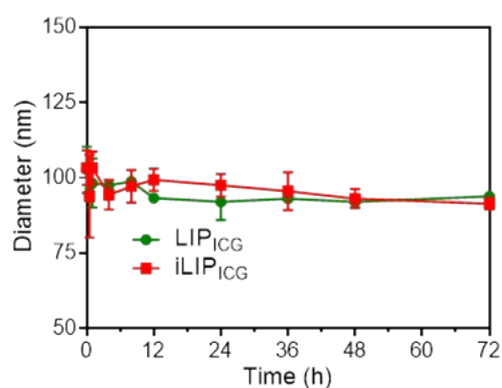

**Figure S1.** The size changes of LIP<sub>ICG</sub> and iLIP<sub>ICG</sub> in 1×PBS with 10% FBS.

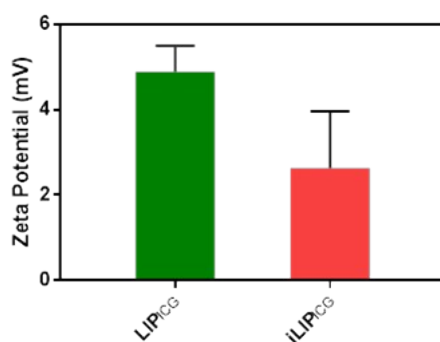

**Figure S2.** The zeta potential of iLIP<sub>ICG</sub> and LIP<sub>ICG</sub>.

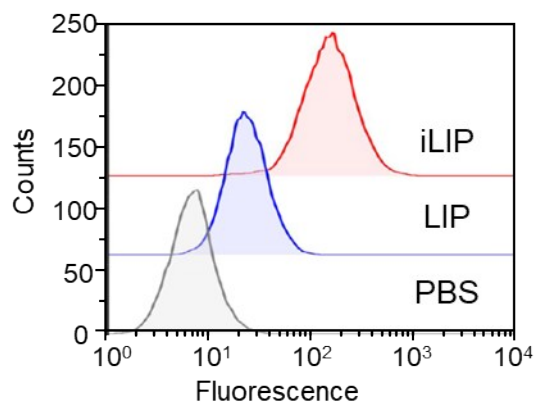

**Figure S3.** The uptake analysis of Hep-2 cells by flow cytometry.

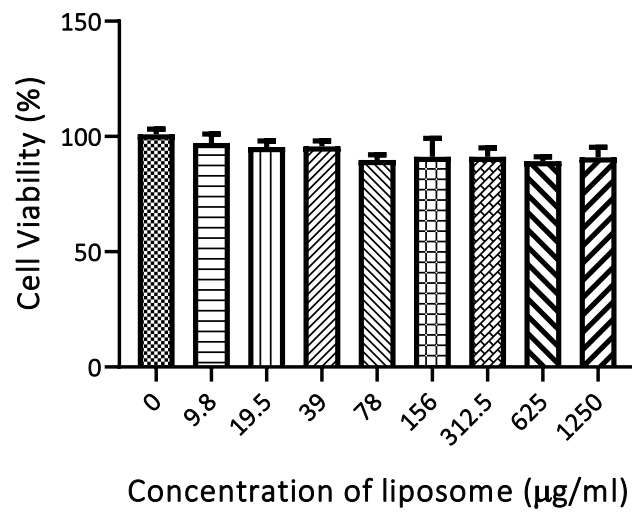

**Figure S4.** The cell viability of liposome alone by MTT assay.

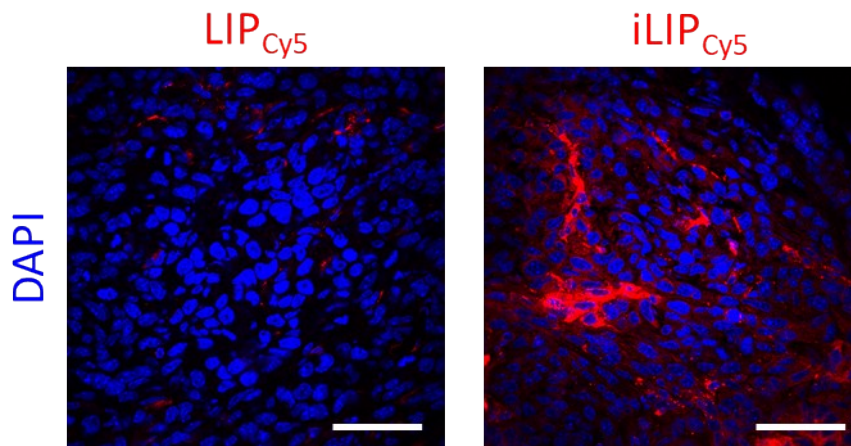

**Figure S5.** The distribution of Cy5 labeled liposomes ( $LIP_{Cy5}$  and  $iLIP_{Cy5}$ ) in Hep2 tumors 24 h after *i.v.* injection. Scale bar 50  $\mu$ m.

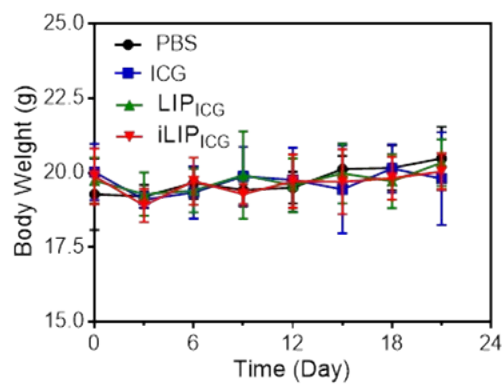

**Figure S6.** Body weight monitoring of the mice during treatments.

**Table S1.** IC<sub>50</sub> of different formulations.

| Formulations          | Free ICG | LIP <sub>ICG</sub> | iLIP <sub>ICG</sub> |
|-----------------------|----------|--------------------|---------------------|
| IC <sub>50</sub> (μM) | 63.03    | 22.34              | 9.36                |
